# Supplementary material for: Entertainment or Health? Exploring the Internet Usage Patterns of the Urban Poor: A Secondary Analysis of a Randomized Controlled Trial
Source: PubMed Central journal article supplement (PMC4796406; doi:10.2196/jmir.4375), 2016-03-03
Supplement: jmir_v18i3e46_app1.pdf [file jmir_v18i3e46_app1.pdf]

## Appendix 1: Definitions of Website Categories

| Category                 | Definition [30]                                                                                                                                                                                                                                  |
|--------------------------|--------------------------------------------------------------------------------------------------------------------------------------------------------------------------------------------------------------------------------------------------|
| Personal Sites and Blogs | Personal websites posted by individuals or groups, blogs.                                                                                                                                                                                        |
| Internet Portals         | Web sites that aggregate a broader set of internet content and topics, and which typically serve as the starting point for an end user.                                                                                                          |
| Search Engines           | Search interfaces using key words or phrases. Returned results may include text, websites, images, videos.                                                                                                                                       |
| Streaming Media          | Sales, delivery, or streaming of audio or video content, including sites that provide downloads for such viewers.                                                                                                                                |
| Reference and Research   | Personal, professional, or educational reference material, including online dictionaries, maps, census, almanacs, library catalogues, genealogy, and scientific information.                                                                     |
| Email Society            | Sites offering web based email and email clients. A variety of topics, groups, and associations relevant to the general populace, broad issues that impact a variety of people, including safety, children, societies, and philanthropic groups. |
| Shopping                 | Department stores, retail stores, company catalogs and other sites that allow online consumer or business shopping and the purchase of goods and services.                                                                                       |
| Social Networks          | Social networking sites that have user communities where users interact, post messages, pictures, and communicate, such as MySpace and Facebook.                                                                                                 |
| Education                | Information pertaining to higher education, including college websites, college finding services, collegiate test preparation, GED courses or materials, and online degree program information.                                                  |
| Job                      | Information on employment, including human relations departments, job finders, or resume help.                                                                                                                                                   |
| Residence                | Information on renting, buying, or selling properties or real estate. Includes apartment listing services, roommate finders, and real estate websites.                                                                                           |
| Finance                  | Banking services, loans, credit, accounting, stock trading, asset management, and investment accounts.                                                                                                                                           |
| Governmental             | Government agencies (local to national level), services, and explanation of laws. Also includes political advocacy websites that promote politicians, political discussions, or other social advocacy issues.                                    |
| News                     | Current events or contemporary issues. Also includes                                                                                                                                                                                             |

Entertainment

radio stations and magazines, newspapers online, headline news sites, newswire services, personalized news services, and weather sites.

Television, movies, music, celebrity news/gossip, entertainment reviews, or the performing arts.

Includes sites for music, online gaming, nudity, pornography.
